# Supplementary material
Source: PubMed Central journal article supplement (PMC6519451)
Supplement: NIHMS1522963-supplement-7.pdf [file NIHMS1522963-supplement-7.pdf]

## Supplemental Information:

**Table S1. Description of substrates. Related to Star Methods.**

| Plasmid Name | Plasmid Description                                            | Amino acid sequence after titin-I27*                                                      |
|--------------|----------------------------------------------------------------|-------------------------------------------------------------------------------------------|
| pAM91        | GGG- titin-I27 <sup>V15P</sup> -23-K-9-C-25-intein-CBD         | GGAGPPPYSAAANDENYALAAHGGKHTFNNENVSCRLG<br>GAASIAVQAPAQHTFNNENVSY                          |
| pAM92        | GGG- titin-I27 <sup>V15P</sup> -21-C-2-K-35-intein-CBD         | GGAGPPPYSAAANDENYALAAHCGGKHTFNNENV SARL<br>GGAASIAVQAPAQHTFNNENVSY                        |
| pAM93        | GGG-titin-I27-23-K-9-C-25-intein-CBD                           | GGAGPPPYSAAANDENYALAAHGGKHTFNNENVSCRLG<br>GAASIAVQAPAQHTFNNENVSY                          |
| pAM94        | GGG- titin-I27 <sup>V13P/V15P</sup> -23-K-9-C-25-intein-CBD    | GGAGPPPYSAAANDENYALAAHGGKHTFNNENVSCRLG<br>GAASIAVQAPAQHTFNNENVSY                          |
| pAM95        | GGG- titin-I27 <sup>V15P</sup> -43-K-8-C-25-intein-CBD         | GGAGPPPYSAAANDENYALAAHGGGAHTFNNENVSAHTF<br>NNENVSKHTFNNENV CRLGGAASIAVQAPAQHTFNNE<br>NVSY |
| pAM96        | GGG- titin-I27 <sup>V15P</sup> -33-K-9-K-8-C-25-intein-CBD     | GGAGPPPYSAAANDENYALAAHGGGAHTFNNENVSKHTF<br>NNENVSKHTFNNENV CRLGGAASIAVQAPAQHTFNNE<br>NVSY |
| pAM97        | GGG- titin-I27 <sup>V15P</sup> -23-K-9-K-9-K-8-C-25-intein-CBD | GGAGPPPYSAAANDENYALAAHGGKHTFNNENVSKHTF<br>NNENVSKHTFNNENV CRLGGAASIAVQAPAQHTFNNE<br>NVSY  |
| pAM98        | titin-I27 <sup>V15P</sup> -23-K-9-C-15-intein-CBD              | GGAGPPPYSAAANDENYALAAHGGKHTFNNENVSCRLG<br>GAASIAVQAPAY                                    |
| pAM99        | titin-I27 <sup>V15P</sup> -23-K-9-C-1-intein-CBD               | GGAGPPPYSAAANDENYALAAHGGKHTFNNENVSCY                                                      |
| pAM100       | titin-I27 <sup>V15P</sup> -21-C-2-K-1-intein-CBD               | GGAGPPPYSAAANDENYALAAHCGGKY                                                               |
| pAM101       | titin-I27 <sup>V15P</sup> -23-K-9-C-15 serine rich-intein-CBD  | GGAGPPPYSAAANDENYALAAHGGKSSSSSSASSC<br>SSSSSSASSSY                                        |
| pAM104       | titin-I27 <sup>V15P</sup> -43-K-11-intein-CBD                  | GGAGPPPYSAAANDENYALAAHGGGAHTFNNENVSAHTF<br>NNENVSKHTFNNENVSCY                             |
| pAM105       | titin-I27 <sup>V15P</sup> -23-K-19-K-11-intein-CBD             | GGAGPPPYSAAANDENYALAAHGGKHTFNNENVSAHTF<br>NNENVSKHTFNNENVSCY                              |

**Table S2. Modification of Substrates. Related to Star Methods.**

| Plasmid Origin | Description                                      | N-terminal modification | Tail modification | Figure                                      |
|----------------|--------------------------------------------------|-------------------------|-------------------|---------------------------------------------|
| pAM91          | titin-I27 <sup>V15P</sup> -23-K-35               | -                       | -                 | 1D, 2E-F, 4C-D, S2D, S3, Table S5, Table S7 |
| pAM91          | titin-I27 <sup>V15P</sup> -23-K-35               | 5-FAM-HHHHHHLPET        | -                 | 2B-C, 3A-B, 4D, S1, S2A/C, S5, S6, Table S3 |
| pAM91          | titin-I27 <sup>V15P</sup> -23-K-35               | -                       | 5-FAM             | 4A, S5B                                     |
| pAM91          | titin-I27 <sup>V15P</sup> -23-K-35               | 5-FAM-HHHHHHLPET        | Cy5               | Table S3                                    |
| pAM91          | titin-I27 <sup>V15P</sup> -23-K-35               | -                       | Cy5               | 2D, 4B, S2B-C, Table 1, Table S4            |
| pAM92          | titin-I27 <sup>V15P</sup> -24-K-35 (DUB)         | 5-FAM-HHHHHHLPET        | Cy5               | 2G, S2E, S2F, Table S6                      |
| pAM93          | titin-I27-23-K-35                                | -                       | -                 | S3, Table S7                                |
| pAM93          | titin-I27-23-K-35                                | 5-FAM-HHHHHHLPET        | -                 | 3A, 3B, Table S3                            |
| pAM93          | titin-I27-23-K-35                                | 5-FAM-HHHHHHLPET        | Cy5               | Table S3                                    |
| pAM94          | titin-I27 <sup>V13P/V15P</sup> -23-K-35          | -                       | -                 | S3, Table S7                                |
| pAM94          | titin-I27 <sup>V13P/V15P</sup> -23-K-35          | 5-FAM-HHHHHHLPET        | -                 | 3A, 3B, Table S3                            |
| pAM95          | titin-I27 <sup>V15P</sup> -43-K-34               | 5-FAM-HHHHHHLPET        | -                 | 3C, S1, S4, Table S3                        |
| pAM95          | titin-I27 <sup>V15P</sup> -43-K-34               | 5-FAM-LPET              | -                 | 5, Table S8                                 |
| pAM96          | titin-I27 <sup>V15P</sup> -33-K-9-K-34           | 5-FAM-HHHHHHLPET        | -                 | 3C, S1, S4, Table S3                        |
| pAM97          | titin-I27 <sup>V15P</sup> -23-K-9-K-9-K-34       | 5-FAM-HHHHHHLPET        | -                 | 3C, S1, S4, Table S3                        |
| pAM98          | titin-I27 <sup>V15P</sup> -23-K-25               | -                       | Cy5               | 4B, Table 1, Table S4                       |
| pAM98          | titin-I27 <sup>V15P</sup> -23-K-25               | -                       | 5-FAM             | Table S3, S5A                               |
| pAM99          | titin-I27 <sup>V15P</sup> -23-K-11               | -                       | Cy5               | 4B, Table 1, Table S4                       |
| pAM99          | titin-I27 <sup>V15P</sup> -23-K-11               | -                       | -                 | 4C, 4D                                      |
| pAM99          | titin-I27 <sup>V15P</sup> -23-K-11               | -                       | 5-FAM             | 4A, S5B, S6                                 |
| pAM100         | titin-I27 <sup>V15P</sup> -23-K-1                | -                       | Cy5               | 4B, Table 1, Table S4                       |
| pAM100         | titin-I27 <sup>V15P</sup> -23-K-1                | -                       | -                 | 4C, 4D                                      |
| pAM100         | titin-I27 <sup>V15P</sup> -23-K-1                | -                       | 5-FAM             | 4A, S5B, S6                                 |
| pAM101         | titin-I27 <sup>V15P</sup> -23-K-25 (serine rich) | -                       | Cy5               | 4B, Table 1, Table S4                       |
| pAM101         | titin-I27 <sup>V15P</sup> -23-K-25 (serine rich) | -                       | -                 | 4C, 4D                                      |
| pAM101         | titin-I27 <sup>V15P</sup> -23-K-25 (serine rich) | -                       | 5-FAM             | 4A, S5B, S6                                 |
| pAM104         | titin-I27 <sup>V15P</sup> -43-K-11               | 5-FAM-LPET              | -                 | 5, S6, Table S8                             |
| pAM105         | titin-I27 <sup>V15P</sup> -23-K-19-K-11          | 5-FAM-LPET              | -                 | 5, S6, Table S8                             |

**Table S3. Single Turnover degradation fits. Related to Figure 2.**

| Substrate Description                                      | $A_1/A_2$     | $\tau_1+t_0$ (s) | $\tau_2+t_0$ (s) | $t_0$ (s) |
|------------------------------------------------------------|---------------|------------------|------------------|-----------|
| FAM- titin-I27-23-K-35 ( $N = 3$ )                         | $2.3 \pm 0.3$ | $47.2 \pm 2.1$   | $499 \pm 98$     | 11.0      |
| FAM-titin-I27-23-K-35-Cy5 ( $N = 3$ )                      | $4.2 \pm 0.3$ | $45.0 \pm 1.8$   | $223 \pm 18$     | 11.5      |
| FAM-titin-I27 <sup>V15P</sup> -23-K-35 ( $N = 3$ )         | $2.1 \pm 0.2$ | $18.1 \pm 0.4$   | $89 \pm 10$      | 7.4       |
| FAM-titin-I27 <sup>V15P</sup> -23-K-35-Cy5 ( $N = 5$ )     | $3.0 \pm 0.6$ | $20.0 \pm 0.7$   | $139 \pm 44$     | 7.5       |
| FAM-titin-I27 <sup>V13P/V15P</sup> -23-K-35 ( $N = 3$ )    | $1.7 \pm 0.1$ | $14.7 \pm 0.3$   | $77 \pm 5$       | 6.0       |
| titin-I27 <sup>V15P</sup> -23-K-25-FAM ( $N = 3$ )         | $5.4 \pm 0.5$ | $21.1 \pm 0.5$   | $157 \pm 30$     | 7.5       |
| FAM-titin-I27 <sup>V15P</sup> -43-K-34 ( $N = 4$ )         | $2.6 \pm 0.5$ | $22.0 \pm 1.8$   | $111 \pm 22$     | 10.0      |
| FAM-titin-I27 <sup>V15P</sup> -33-K-9-K-34 ( $N = 4$ )     | $3.1 \pm 0.7$ | $21.0 \pm 0.8$   | $108 \pm 14$     | 10.0      |
| FAM-titin-I27 <sup>V15P</sup> -23-K-9-K-9-K-34 ( $N = 4$ ) | $3.2 \pm 0.8$ | $21.4 \pm 0.2$   | $126 \pm 12$     | 10.0      |

**Table S4. Tail insertion fits. Related to Figure 2.**

| Substrate Description                                            | $A_1/A_2$     | $\tau_1$ (s)    | $\tau_2$ (s)    | $A_1$<br>(normalized<br>to titin-<br>I27 <sup>V15P</sup> -23-K-<br>35) |
|------------------------------------------------------------------|---------------|-----------------|-----------------|------------------------------------------------------------------------|
| titin-I27 <sup>V15P</sup> -23-K-35-Cy5 ( $N = 9$ )               | $2.0 \pm 0.3$ | $1.61 \pm 0.32$ | $17.3 \pm 3.0$  | $1.00 \pm 0.03$                                                        |
| titin-I27 <sup>V15P</sup> -23-K-25 (serine rich)-Cy5 ( $N = 5$ ) | $1.1 \pm 0.1$ | $7.15 \pm 1.00$ | $31.5 \pm 4.3$  | $0.51 \pm 0.04$                                                        |
| titin-I27 <sup>V15P</sup> -23-K-25-Cy5 ( $N = 3$ )               | $1.7 \pm 0.1$ | $1.73 \pm 0.02$ | $17.4 \pm 0.9$  | $0.87 \pm 0.05$                                                        |
| titin-I27 <sup>V15P</sup> -23-K-11-Cy5 ( $N = 3$ )               | $0.6 \pm 0.2$ | $0.70 \pm 0.09$ | $61.9 \pm 27.3$ | $0.24 \pm 0.01$                                                        |
| titin-I27 <sup>V15P</sup> -23-K-1-Cy5 ( $N = 3$ )                | $0.9 \pm 0.1$ | $0.46 \pm 0.03$ | $60.0 \pm 12.6$ | $0.16 \pm 0.001$                                                       |

**Table S5. Conformational change Fits. Related to Figure 2.**

| Substrate Description                          | $A_1/A_2$     | $\tau_1+t_0$ (s) | $\tau_2+t_0$ (s) | $t_0$ (s) |
|------------------------------------------------|---------------|------------------|------------------|-----------|
| titin-I27 <sup>V15P</sup> -23-K-35 ( $N = 6$ ) | $2.3 \pm 0.2$ | $2.22 \pm 0.10$  | $24.9 \pm 1.8$   | 0.4       |

**Table S6. Deubiquitination Fits. Related to Figure 2.**

| Substrate Description                                       | $A_1/A_2$     | $\tau_1$ (s)    | $\tau_2$ (s)   |
|-------------------------------------------------------------|---------------|-----------------|----------------|
| FAM-titin-I27 <sup>V15P</sup> -24-K-35(DUB)-Cy5 ( $N = 3$ ) | $0.9 \pm 0.1$ | $6.83 \pm 0.17$ | $35.6 \pm 2.6$ |

**Table S7. ATPase rates. Related to Figure 3.**

| Sample                                                         | ATPase rate (ATP s <sup>-1</sup> enzyme <sup>-1</sup> ) |
|----------------------------------------------------------------|---------------------------------------------------------|
| 26S alone ( $N = 3$ )                                          | $0.73 \pm 0.02$                                         |
| 26S + ub'd titin-I27 <sup>V13P/V15P</sup> -23-K-35 ( $N = 3$ ) | $1.12 \pm 0.11$                                         |
| 26S + ub'd titin-I27 <sup>V15P</sup> -23-K-35 ( $N = 3$ )      | $1.35 \pm 0.12$                                         |
| 26S + ub'd titin-I27-23-K-35 ( $N = 3$ )                       | $1.47 \pm 0.11$                                         |

**Table S8. Degradation velocities from SDS-PAGE analysis.\* Related to Figure 5.**

| <b>Substrate Description</b>                                        | <b>A<sub>1</sub></b> | <b><math>\tau_1</math> (s)</b> | <b>A<sub>2</sub></b> | <b><math>\tau_2</math> (s)</b> |
|---------------------------------------------------------------------|----------------------|--------------------------------|----------------------|--------------------------------|
| FAM-titin-I27 <sup>V15P</sup> -43-K-34 ( <i>N</i> = 5) <sup>†</sup> | 0.87 ± 0.06          | 23.4 ± 5.6                     | N/A                  | N/A                            |
| FAM-titin-I27 <sup>V15P</sup> -43-K-11 ( <i>N</i> = 5)              | 0.36 ± 0.06          | 45.8 ± 12.9                    | 0.39 ± 0.05          | 609 ± 203                      |
| FAM-titin-I27 <sup>V15P</sup> -23-K-19-K-11 ( <i>N</i> = 5)         | 0.38 ± 0.08          | 45.9 ± 13.3                    | 0.37 ± 0.07          | 409 ± 118                      |

\*Because the reactions were performed with enzyme only slight about  $K_m$  these rates are likely underestimates.

<sup>†</sup>Fit with a single exponential curve.
